# Supplementary material for: Risperidone or Aripiprazole Can Resolve Autism Core Signs and Symptoms in Young Children: Case Study
Source: MDPI journal article supplement (doi:10.3390/children8050318), 2021-04-22
Supplement: s1 [file s1]

**Supplementary Table S1** Details of each patient's symptoms at presentation, diagnosis, and current status

| Case | Main symptoms at presentation                                                                                                                                                                                                                                                                                                                                                                                                                                         | Diagnosis as per DSM-5 criteria                                           | CGI-S/CARS2-ST scores before treatment | Current behavior after treatment                                                                                                                                                                                                                                                                                                                                                                                                                                                                                                               | CGI-S/CGI-I/CARS2-ST scores after treatment |
|------|-----------------------------------------------------------------------------------------------------------------------------------------------------------------------------------------------------------------------------------------------------------------------------------------------------------------------------------------------------------------------------------------------------------------------------------------------------------------------|---------------------------------------------------------------------------|----------------------------------------|------------------------------------------------------------------------------------------------------------------------------------------------------------------------------------------------------------------------------------------------------------------------------------------------------------------------------------------------------------------------------------------------------------------------------------------------------------------------------------------------------------------------------------------------|---------------------------------------------|
| 1    | <ul style="list-style-type: none"> <li>- sudden developmental regression at the age of 18 months</li> <li>- lost all social skills</li> <li>- lost eye contact</li> <li>- no response to his name</li> <li>- no joint attention</li> <li>- hand flapping</li> <li>- repetitive touching of ears</li> <li>- walked on his toes</li> <li>- lost interest in playing with other children</li> <li>- no expressive language</li> <li>- poor receptive language</li> </ul> | ASD level 2, requiring substantial support, plus language impairment      | 5/36                                   | <ul style="list-style-type: none"> <li>- follows two-step commands</li> <li>- started to count</li> <li>- responds to his name consistently</li> <li>- can combine words to form simple sentences (e.g., "key cars go").</li> <li>- jokes with mother</li> <li>- imitates animal sounds</li> <li>- no longer flaps hands</li> <li>- no longer walks on toes or repeatedly touches his ears</li> <li>- started to play with other children and give high-fives</li> <li>- family thinks he is comparable in development to his peers</li> </ul> | 1/1/17                                      |
| 2    | <ul style="list-style-type: none"> <li>- poor eye contact</li> <li>- no response to her name</li> <li>- no pointing</li> <li>- no joint attention</li> <li>- did not play with other children</li> </ul>                                                                                                                                                                                                                                                              | ASD level 3, requiring very substantial support, plus language impairment | 6/45.5                                 | <ul style="list-style-type: none"> <li>- can now talk in three- to four-word sentences</li> <li>- makes good eye contact</li> <li>- started to point</li> </ul>                                                                                                                                                                                                                                                                                                                                                                                | 1/1/16                                      |

|   |                                                                                                                                                                                                                                                                                                                                                                                                                                                |                                                                      |        |                                                                                                                                                                                                                                                                                                                                                                                                                                                                                                                |        |
|---|------------------------------------------------------------------------------------------------------------------------------------------------------------------------------------------------------------------------------------------------------------------------------------------------------------------------------------------------------------------------------------------------------------------------------------------------|----------------------------------------------------------------------|--------|----------------------------------------------------------------------------------------------------------------------------------------------------------------------------------------------------------------------------------------------------------------------------------------------------------------------------------------------------------------------------------------------------------------------------------------------------------------------------------------------------------------|--------|
|   | <ul style="list-style-type: none"> <li>- delayed expressive and receptive language</li> <li>- aggressive, impulsive, and had frequent temper tantrums</li> <li>- was very difficult to manage</li> <li>- very selective in her food and habitually threw things</li> </ul>                                                                                                                                                                     |                                                                      |        | <ul style="list-style-type: none"> <li>- intact joint attention</li> <li>- shows no aggression or stereotypical behavior</li> <li>- plays with other children</li> <li>- started to learn the alphabet and numbers</li> <li>- started to eat a greater variety of food</li> <li>- currently weaning off medications</li> </ul>                                                                                                                                                                                 |        |
| 3 | <ul style="list-style-type: none"> <li>- poor response to his name</li> <li>- poor joint attention</li> <li>- delayed expressive and receptive language</li> <li>- no pointing</li> <li>- did not play with other children</li> <li>- liked to jump on his bed</li> <li>- no emotional reactions</li> <li>- liked to hold orange items</li> <li>- liked to wear only one specific shirt</li> <li>- very hyperactive and inattentive</li> </ul> | ASD level 2, requiring substantial support, plus language impairment | 6/45   | <ul style="list-style-type: none"> <li>- good response to his name</li> <li>- good joint attention</li> <li>- much improved expressive and receptive language</li> <li>- started to point well</li> <li>- plays well with other children</li> <li>- no longer jumps on his bed</li> <li>- interacts with his family and has started to show emotions</li> <li>- no longer likes to hold orange items</li> <li>- can wear different shirts now</li> <li>- still a little hyperactive and inattentive</li> </ul> | 2/2/23 |
| 4 | <ul style="list-style-type: none"> <li>- poor eye contact</li> <li>- poor expressive and receptive language</li> <li>- abnormal, stereotypical hand and finger movements</li> <li>- self-talked a lot</li> </ul>                                                                                                                                                                                                                               | ASD level 2, requiring substantial support, plus language impairment | 5/39.5 | <ul style="list-style-type: none"> <li>- shows good eye contact</li> <li>- responds to his name consistently</li> <li>- has good joint attention</li> <li>- started to play with family members</li> </ul>                                                                                                                                                                                                                                                                                                     | 2/2/21 |

|   |                                                                                                                                                                                                                                                                                                                                                                                                                                                |                                                                           |      |                                                                                                                                                                                                                                                                                                                                                                                                                                                                                                   |          |
|---|------------------------------------------------------------------------------------------------------------------------------------------------------------------------------------------------------------------------------------------------------------------------------------------------------------------------------------------------------------------------------------------------------------------------------------------------|---------------------------------------------------------------------------|------|---------------------------------------------------------------------------------------------------------------------------------------------------------------------------------------------------------------------------------------------------------------------------------------------------------------------------------------------------------------------------------------------------------------------------------------------------------------------------------------------------|----------|
|   | <ul style="list-style-type: none"> <li>- no joint attention</li> <li>- very limited scope of interest</li> <li>- did not play with other children</li> </ul>                                                                                                                                                                                                                                                                                   |                                                                           |      | <ul style="list-style-type: none"> <li>- speaks in two- to three-word sentences to communicate his needs</li> <li>- started to learn the alphabet</li> <li>- complete resolution of stereotypical behavior such as finger flicking</li> <li>- no longer displays self-talking</li> </ul>                                                                                                                                                                                                          |          |
| 5 | <ul style="list-style-type: none"> <li>- poor response to his name</li> <li>- poor eye contact</li> <li>- poor communication skills</li> <li>- no pointing</li> <li>- self-talked a lot</li> <li>- poor joint attention</li> <li>- very delayed expressive and receptive language</li> <li>- poor social skills</li> <li>- abnormal, stereotypical behavior with hand flapping</li> <li>- hyperactive with a limited attention span</li> </ul> | ASD level 2, requiring substantial support, plus language impairment      | 5/36 | <ul style="list-style-type: none"> <li>- started to focus and sit down for 45 minutes at a time</li> <li>- started to recognize and interact with family members</li> <li>- started to speak in two- to three-word sentences</li> <li>- follows two-step commands</li> <li>- hand flapping is much less, only occurs now when he is very excited</li> <li>- no more self-talking</li> <li>- responds to his name well</li> <li>- developed joint attention</li> <li>- good eye contact</li> </ul> | 2/2/18.5 |
| 6 | <ul style="list-style-type: none"> <li>- poor response to his name</li> <li>- poor eye contact</li> <li>- no pointing</li> <li>- did not play with other children</li> </ul>                                                                                                                                                                                                                                                                   | ASD level 3, requiring very substantial support, plus language impairment | 6/42 | <ul style="list-style-type: none"> <li>- achieved normal development with complete resolution of ASD symptoms</li> <li>- now attends a regular school where he performs above average</li> <li>- off all medications</li> </ul>                                                                                                                                                                                                                                                                   | 1/1/16   |

|   |                                                                                                                                                                                                                                                                                                                                                                                                                               |                                                                                              |      |                                                                                                                                                                                                                                                                                                                                                                                                                                                                                                 |        |
|---|-------------------------------------------------------------------------------------------------------------------------------------------------------------------------------------------------------------------------------------------------------------------------------------------------------------------------------------------------------------------------------------------------------------------------------|----------------------------------------------------------------------------------------------|------|-------------------------------------------------------------------------------------------------------------------------------------------------------------------------------------------------------------------------------------------------------------------------------------------------------------------------------------------------------------------------------------------------------------------------------------------------------------------------------------------------|--------|
|   | <ul style="list-style-type: none"> <li>- hyperactive and poor attention</li> <li>- no joint attention</li> <li>- poor expressive and receptive language</li> <li>- stereotypical behavior of walking on his toes and looking from eye corners</li> </ul>                                                                                                                                                                      |                                                                                              |      |                                                                                                                                                                                                                                                                                                                                                                                                                                                                                                 |        |
| 7 | <ul style="list-style-type: none"> <li>- poor eye contact</li> <li>- no joint attention</li> <li>- no pointing</li> <li>- did not follow commands</li> <li>- poor expressive and receptive language</li> <li>- did not play with other children</li> <li>- no meaningful communication with his parents</li> <li>- very sound sensitive</li> <li>- very hyperactive and inattentive</li> <li>- poor sleep at night</li> </ul> | ASD level 3, requiring very substantial support, plus language impairment with comorbid ADHD | 6/41 | <ul style="list-style-type: none"> <li>- much less hyperactive</li> <li>- started to count to 10</li> <li>- started to communicate with parents and follow one-step commands</li> <li>- started to say his name when asked</li> <li>- started to approach other family members</li> <li>- started to have better receptive language</li> <li>- makes good eye contact</li> <li>- good joint attention</li> <li>- no longer sound sensitive</li> <li>- started to sleep well at night</li> </ul> | 2/2/21 |
| 8 | <ul style="list-style-type: none"> <li>- poor response to his name</li> <li>- no pointing</li> <li>- no expressive language with poor receptive language</li> <li>- no joint attention</li> </ul>                                                                                                                                                                                                                             | ASD level 2, requiring substantial support, plus language impairment                         | 5/36 | <ul style="list-style-type: none"> <li>- attending regular school and performs above average academically</li> <li>- complete resolution of his ASD symptoms</li> <li>- off all medications</li> </ul>                                                                                                                                                                                                                                                                                          | 1/1/15 |

|    |                                                                                                                                                                                                                                                                                                                                                                                                                                                                                                                                                                                            |                                                                      |        |                                                                                                                                                                                                                                                                                                                      |        |
|----|--------------------------------------------------------------------------------------------------------------------------------------------------------------------------------------------------------------------------------------------------------------------------------------------------------------------------------------------------------------------------------------------------------------------------------------------------------------------------------------------------------------------------------------------------------------------------------------------|----------------------------------------------------------------------|--------|----------------------------------------------------------------------------------------------------------------------------------------------------------------------------------------------------------------------------------------------------------------------------------------------------------------------|--------|
|    | <ul style="list-style-type: none"> <li>- poor socialization with other children</li> <li>- walked on his toes</li> <li>- ate only two kinds of food</li> <li>- flapped his hands when excited</li> <li>- hypersensitive to sounds</li> <li>- hyperactive with a poor attention span</li> </ul>                                                                                                                                                                                                                                                                                             |                                                                      |        |                                                                                                                                                                                                                                                                                                                      |        |
| 9  | <ul style="list-style-type: none"> <li>- poor eye contact</li> <li>- no response to her name</li> <li>- no joint attention</li> <li>- no pointing</li> <li>- poor social interaction and did not play with other children</li> <li>- no joy in sharing</li> <li>- very selective with her food</li> <li>- liked to line things up</li> <li>- high tolerance to pain</li> <li>- had poor expressive language, could only say “mama” and “dada” non-specifically, and had poor receptive language with difficulty in following commands</li> <li>- poor attention and hyperactive</li> </ul> | ASD level 2, requiring substantial support, plus language impairment | 5/36   | <ul style="list-style-type: none"> <li>- attends regular school and among the top 5 in the class</li> <li>- normal expressive and receptive language</li> <li>- normal behavior and attention span</li> <li>- complete resolution of ASD symptoms</li> <li>- only on atomoxetine to control hyperactivity</li> </ul> | 1/1/17 |
| 10 | <ul style="list-style-type: none"> <li>- poor eye contact</li> </ul>                                                                                                                                                                                                                                                                                                                                                                                                                                                                                                                       | ASD level 2, requiring                                               | 6/36.5 | <ul style="list-style-type: none"> <li>- now in a regular school</li> </ul>                                                                                                                                                                                                                                          | 1/1/15 |

|  |                                                                                                                                                                                                                                                                                                                                                                                                         |                                                               |  |                                                                                                                                                                                                                                                                  |  |
|--|---------------------------------------------------------------------------------------------------------------------------------------------------------------------------------------------------------------------------------------------------------------------------------------------------------------------------------------------------------------------------------------------------------|---------------------------------------------------------------|--|------------------------------------------------------------------------------------------------------------------------------------------------------------------------------------------------------------------------------------------------------------------|--|
|  | <ul style="list-style-type: none"> <li>- poor joint attention</li> <li>- did not play with other children</li> <li>- poor expressive and receptive language</li> <li>- rarely pointed</li> <li>- hyperactive and inattentive</li> <li>- no joy in sharing</li> <li>- frequently stared into the distance and at the ceiling</li> <li>- no imagination</li> <li>- anxiety and temper tantrums</li> </ul> | substantial support, plus language delay and comorbid anxiety |  | <ul style="list-style-type: none"> <li>- average performance in class</li> <li>- normal expressive and receptive language</li> <li>- complete resolution of ASD symptoms</li> <li>- still below average in writing skills but improving with training</li> </ul> |  |
|--|---------------------------------------------------------------------------------------------------------------------------------------------------------------------------------------------------------------------------------------------------------------------------------------------------------------------------------------------------------------------------------------------------------|---------------------------------------------------------------|--|------------------------------------------------------------------------------------------------------------------------------------------------------------------------------------------------------------------------------------------------------------------|--|

ADHD, attention deficit hyperactivity disorder; ASD, autism spectrum disorder; CGI-I, Clinical Global Impression–Improvement; CGI-S, Clinical Global Impression–

Severity; CARS2-ST, Clinical Autism Rating Scale 2–Standard Test
